# Supplementary material for: Tailoring electronic structure to enhance the ammonium-ion storage properties of VO2 by molybdenum doping toward highly efficient aqueous ammonium-ion batteries
Source: Royal Society of Chemistry journal article supplement (doi:10.1039/d4qi01910e), 2024-11-19
Supplement: d4qi01910e1.pdf [file d4qi01910e1.pdf]

## Supplementary Information

### **Tailoring electronic structure to enhance ammonium-ion storage properties of VO<sub>2</sub> by molybdenum doping toward highly-efficient aqueous ammonium-ion battery**

Yifu Zhang<sup>1,2\*</sup>, Zhenhua Zhou<sup>2</sup>, Xianfang Tan<sup>1</sup>, Yanyan Liu<sup>2</sup>, Fangfang Zhang<sup>1</sup>, Changgong Meng<sup>2</sup>,  
Xiaoming Zhu<sup>1,\*</sup>

<sup>1</sup>*Hubei Key Laboratory of Radiation Chemistry and Functional Materials, School of Nuclear Technology and Chemistry & Biology, Hubei University of Science and Technology, Xianning 437100, P. R. China*

<sup>2</sup>*School of Chemistry, Dalian University of Technology, Dalian 116024, P. R. China*

\*Corresponding authors.

E-mail address: yfzhang@dlut.edu.cn (Yifu Zhang); zhuxiaoming@hbust.edu.cn (Xiaoming Zhu)

## 1. Experimental section

### 1.1. Materials

The chemicals with analytical grade, including vanadium pentoxide ( $V_2O_5$ ), ammonium molybdate, ammonium sulfate ( $(NH_4)_2SO_4$ ), hydrochloric acid (HCl), ammonium persulphate ( $(NH_4)_2S_2O_8$ ), aniline (ANI, purity > 99.0%), hydrogen peroxide ( $H_2O_2$ , 30 wt.%) and ethanol, were purchased from Sinopharm Chemical Reagent Co., Ltd. and used without any further purification.

### 1.2. Synthesis of $VO_2$ and $VO_2$ -Mo

In a typical synthesis, commercial  $V_2O_5$  (0.455 g) and a certain amount of ammonium molybdate (the mole amount of molybdate was adjusted to be 1.0 %, 2.0 % and 4.0 %) were added to 28 mL of distilled water. Subsequently, 3 mL of  $H_2O_2$  was added and stirred for 0.5 h. After an orange solution is formed, 5 mL of anhydrous ethanol was added and the stirring was continued for 10 min, and then the above mixture was transferred to a 50 mL PTFE-lined autoclave, sealed and heated up to 180 °C for 72 hours. After the reaction, it was cooled to the room temperature naturally. The samples were collected by filtering off, washing with distilled water and absolute ethanol several times and drying in vacuum at 75 °C to obtain molybdenum doped vanadium dioxide (denoted as  $VO_2$ -Mo).

The pure  $VO_2$  was synthesized with the same as the  $VO_2$ -Mo without the presence of ammonium molybdate. The usage of  $(NH_4)_2MoO_4$  is crucial for controlling the  $NH_4^+$  storage properties of the material, and we introduced  $(NH_4)_2MoO_4$  with masses of 0, 0.009, 0.018, and 0.036 g to obtain four samples with different doping amounts of  $VO_2$ ,  $VO_2$ -Mo (1%),  $VO_2$ -Mo (2%), and  $VO_2$ -Mo (4%), respectively.

### 1.3. Synthesis of PANI

In a typical synthesis of the polyaniline (PANI) as the cathode material [1], 0.365 mL of aniline solution was added to 15 mL of 1 M HCl solution to obtain solution A, which was stirred in an ice-water bath for 1 h. 0.228 g of  $(NH_4)_2S_2O_8$  was dissolved in 5 mL of HCl to obtain solution B, which was finally added dropwise to solution A and reacted for 1 h in an ice-water bath to obtain the PANI.

### 1.4. Materials characterizations

The crystal structure information of the samples was analyzed on the X-ray powder diffractometer (Bruker, D8 Advance) equipped with Cu K $\alpha$  radiation ( $\lambda=1.5418 \text{ \AA}$ ) and Confocal micro-Raman Spectrometer (Raman, inVia Qontor, Renishaw). Fourier transform infrared (FTIR) spectroscopy of the solid samples was conducted on Nicolet 6700 spectrometer using KBr pellet technique from 4000 to 400  $\text{cm}^{-1}$  with a resolution of 4  $\text{cm}^{-1}$ . About 1 wt% of the samples and 99 wt% of KBr were mixed homogeneously, and then the mixture was pressed to a pellet. The electron paramagnetic resonance (EPR) spectra were performed on EMX-Micro (Bruker, German). The surface elements valence states and chemical composition were performed on an X-ray photoelectron spectroscopy (XPS) spectrometer (Shimadzu, Axis Supra<sup>+</sup>) with the excitation source of Al K $\alpha$  X-ray radiation. The morphologies of the materials were observed by a field emission scanning electron microscope (FE-SEM, NOVA NanoSEM 450, FEI) and field emission transmission electron microscope (TEM, FEITecnaei F30, FEI). Energy dispersive spectroscopy (EDS) and elemental mapping were done using the field emission scanning electron microscope (FE-SEM, NOVA NanoSEM 450, FEI). Micromeritics ASAP-2020 was employed to record the pore information based on Brunauer-Emmett-Teller (BET) theory and the Barrett-Joyner-Halenda (BJH) method, which was degassed at 130 °C.

### 1.5. Electrochemical measurements

A homogeneous slurry was formed by mixing the active material, acetylene black, and polyvinylidene fluoride (PVDF) in N-methyl-2-pyrrolidone (NMP) at the mass ratio of 7:2:1. The slurry was coated onto Ti foil and dried under vacuum at 60 °C overnight to prepare the working electrodes. The active material mass loading was about 2  $\text{mg}\cdot\text{cm}^{-2}$ , and all measurements were taken at room temperature. For single electrode performances, electrochemical tests were performed in the three-electrode system constructed by the working electrode, Ag/AgCl reference electrode, and active carbon as counter electrode. Aqueous 1 M  $(\text{NH}_4)_2\text{SO}_4$  solution was used as electrolyte to study the  $\text{NH}_4^+$  storage mechanism. To explore the practicability of the material, full cells were assembled using  $\text{VO}_2\text{-Mo}$  as the anode, PANI as the cathode and 1 M  $(\text{NH}_4)_2\text{SO}_4$  as the electrolyte assembled in standard CR2032 coin cell. In both single electrode system and full cell, cyclic voltammetry (CV) and electrochemical impedance spectroscopy (EIS) (0.01-100 kHz) tests were conducted using the CHI-660D electrochemical workstation, while the galvanostatic charge-discharge (GCD) were carried out using LAND CT2001A.

## 1.6. Theoretical calculation method

All the geometric optimizations, single-point energies and electronic structures calculations are performed through the spin-polarized density functional theory method by using the Cambridge Serial Total Energy Package (CASTEP) code on the basis of the plane-wave pseudopotential. The Perdew-Burke-Ernzerhof (PBE) exchange-correlation functional for generalized gradient approximation (GGA) and the projector augmented wave (PAW) method explaining the core-valence interactions are employed. The valence electrons were expanded in a plane-wave basis set within a cutoff energy of 500 eV. The electronic relaxation is performed to within an energy tolerance of  $2 \times 10^{-5}$  eV for self-consistency, while ionic optimizations are performed until all the residual forces are smaller than  $0.05 \text{ eV/\AA}$ . Monkhorst-Pack meshes with  $1 \times 1 \times 1$  k-points were used to sample the Brillouin zone of  $\text{VO}_2$  and  $\text{VO}_2\text{-Mo}$  calculations, respectively. The adsorption energies were calculated on the  $\text{VO}_2$  and  $\text{VO}_2\text{-Mo}$  (1 0 0) plane using a  $7.44 \times 6.58 \text{ \AA}^2$  cell with an at least  $15 \text{ \AA}$  vacuum along the c axis to separate the slabs. For the calculation of adsorption energies, single gamma-point grid was used. The force acting on each atom converged to  $0.004 \text{ Ha} \cdot \text{\AA}^{-1}$  and the energy criterion was set to  $2 \times 10^{-5} \text{ Ha}$ .

## Figures

Figure S1

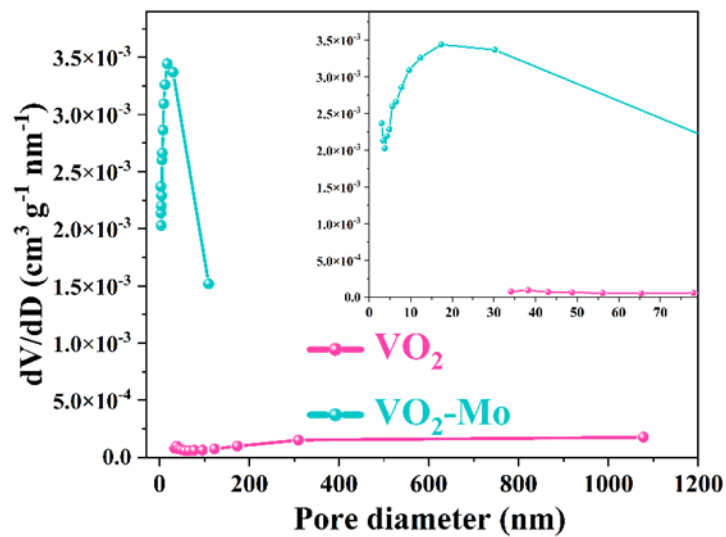

**Figure S1.** Pore size distribution based on Barrett-Joyner-Halenda (BJH) method using the adsorption isotherms of VO<sub>2</sub> and VO<sub>2</sub>-Mo.

Figure S2

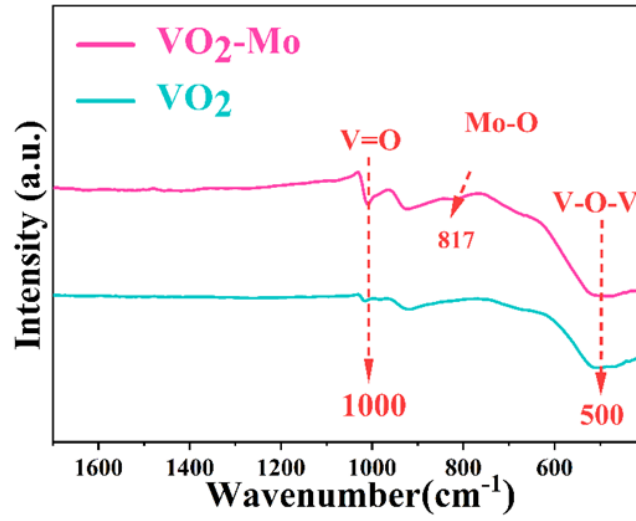

Figure S2. FTIR spectra of VO<sub>2</sub> and VO<sub>2</sub>-Mo.

Figure S3

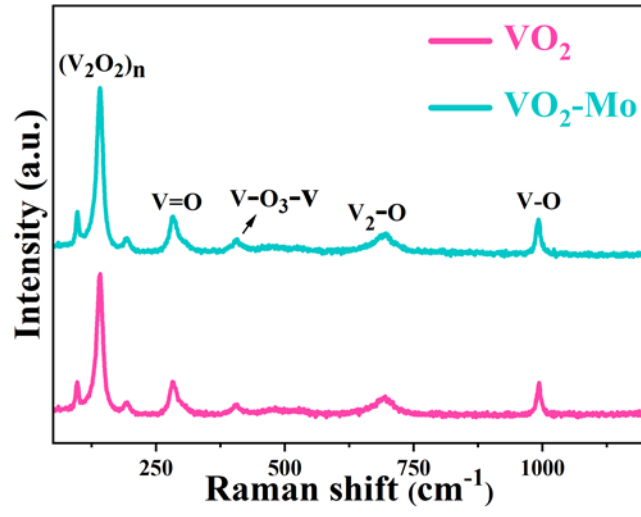

Figure S3. Raman spectra of VO<sub>2</sub> and VO<sub>2</sub>-Mo.

Figure S4

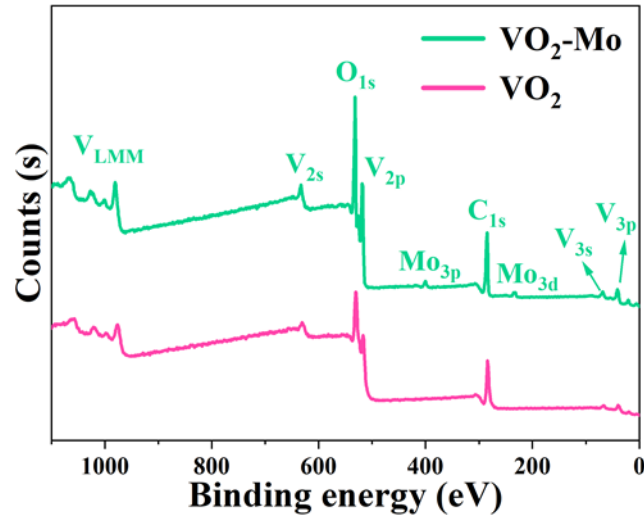

Figure S4. Full XPS spectra of VO<sub>2</sub> and VO<sub>2</sub>-Mo.



Figure S5

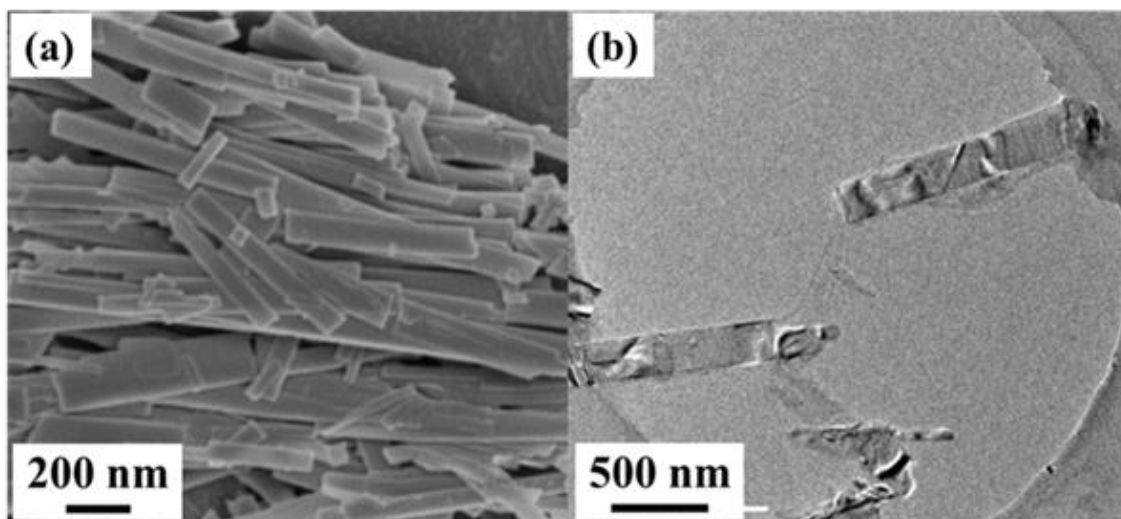

Figure S5. (a) SEM image of VO<sub>2</sub>; (b) TEM image of VO<sub>2</sub>.

Figure S6

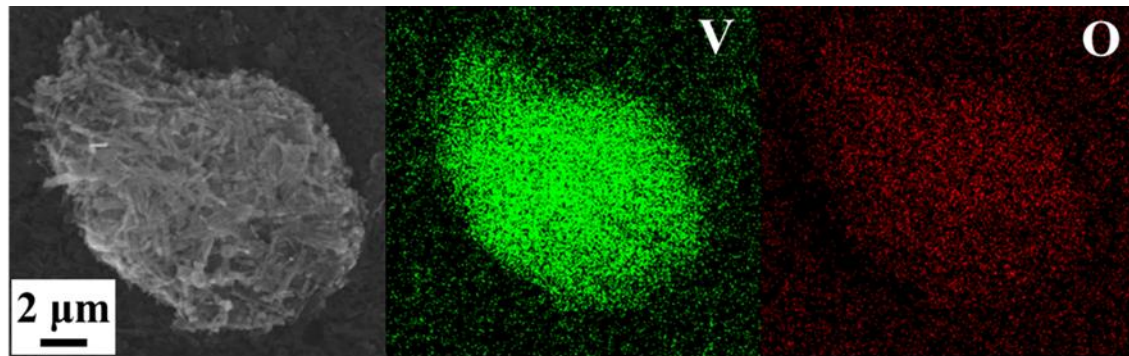

Figure S6. Elemental mapping images of  $\text{VO}_2$ .

Figure S7

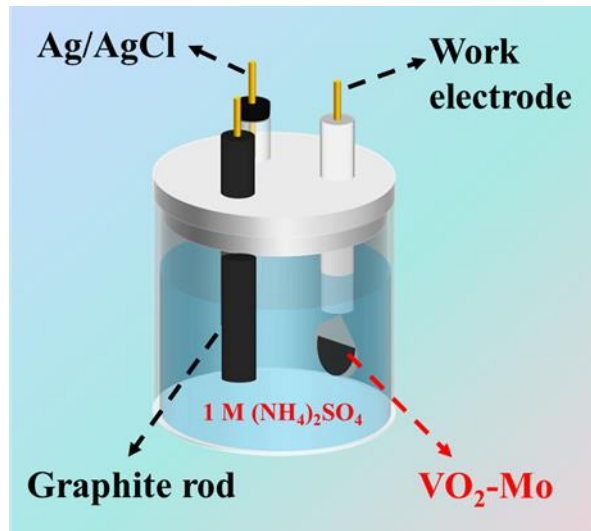

**Figure S7.** Three-electrode configuration for evaluating the electrochemical properties of VO<sub>2</sub> and VO<sub>2</sub>-Mo for ammonium-ion storage.

Figure S8

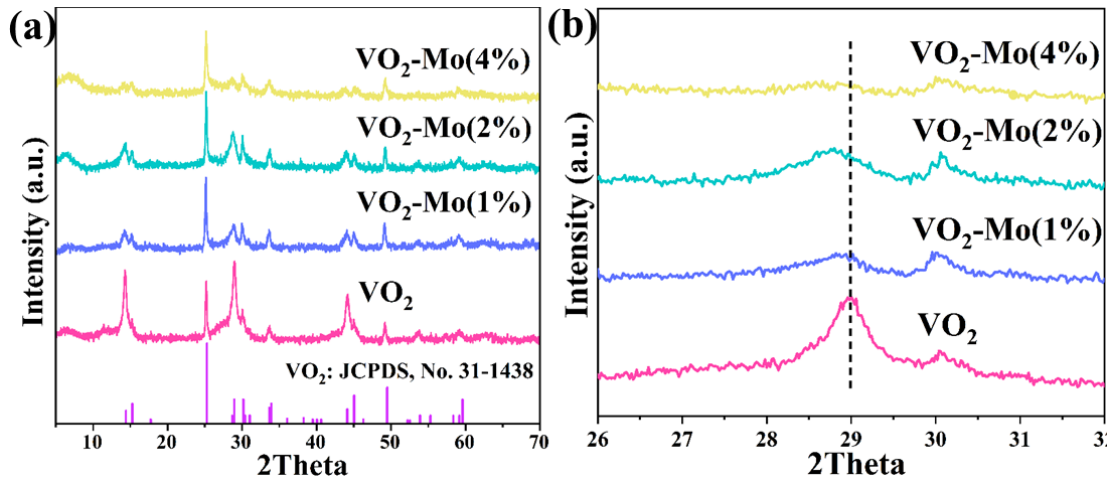

Figure S8. XRD patterns of VO<sub>2</sub> and VO<sub>2</sub>-Mo with different content of Mo doping: (a) A large range 2θ; (b) A small range 2θ.

Figure S9

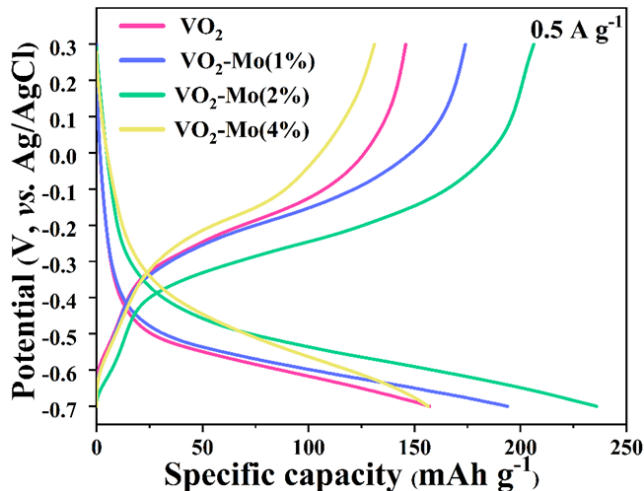

Figure S9. GCD curves of VO<sub>2</sub> and VO<sub>2</sub>-Mo with different content of Mo doping (Figure S8) to show its influence on ammonium-ion storage properties.

To study the influence of the amount of Mo in VO<sub>2</sub> on its electrochemical properties, the mole amount of ammonium molybdate was adjusted to be 0, 1.0 %, 2.0 % and 4.0 % based on the following equation (S1):

$$\text{Percentage (\%)} = [n(\text{Mo})/n(\text{V}+\text{Mo})]*100\% \quad (\text{S1})$$

These corresponding samples were named as VO<sub>2</sub>, VO<sub>2</sub>-Mo(1%), VO<sub>2</sub>-Mo(2%) and VO<sub>2</sub>-Mo(4%), respectively.

The galvanostatic charge-discharge (GCD) curves of these samples at 0.5 A g<sup>-1</sup> are shown in Figure S9 (Supplementary Material), which proves that the most significant performance enhancement of VO<sub>2</sub> that is achieved at a Mo content of 2 %. In detail, with the Mo mole ratio from 0 to 1.0 %, 2.0 % and 4.0 %, the specific capacities are measured from 152 mAh g<sup>-1</sup> to 184 mAh g<sup>-1</sup>, 222 mAh g<sup>-1</sup> and 144 mAh g<sup>-1</sup>, respectively. VO<sub>2</sub> with 2% Mo-doping exhibits the best electrochemical properties for NH<sub>4</sub><sup>+</sup>-storage among these samples. In this work, for convenience, we use the VO<sub>2</sub>-Mo representing Mo-doped VO<sub>2</sub>-Mo(2%) in the whole article.

Figure S10

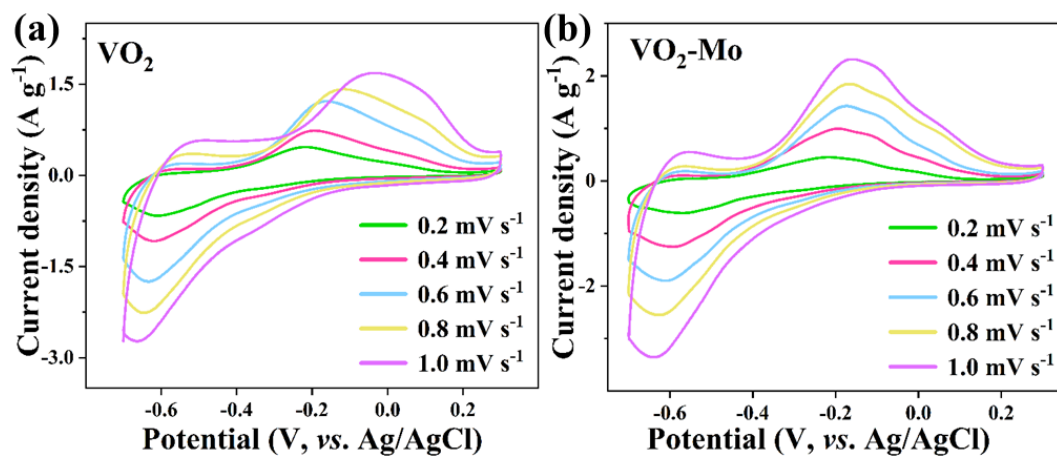

Figure S10. (a) CV curves of  $\text{VO}_2$  at different scan rates; (b) CV curves of  $\text{VO}_2\text{-Mo}$  at different scan rates.

Figure S11

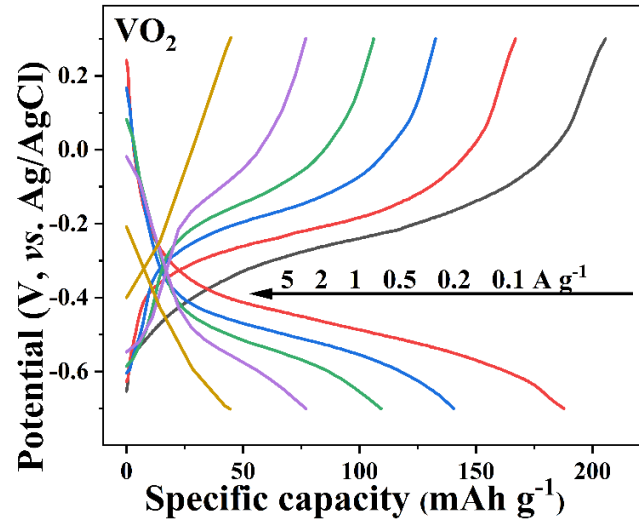

Figure S11. GCD curves of VO<sub>2</sub> at different current densities.

Figure S12

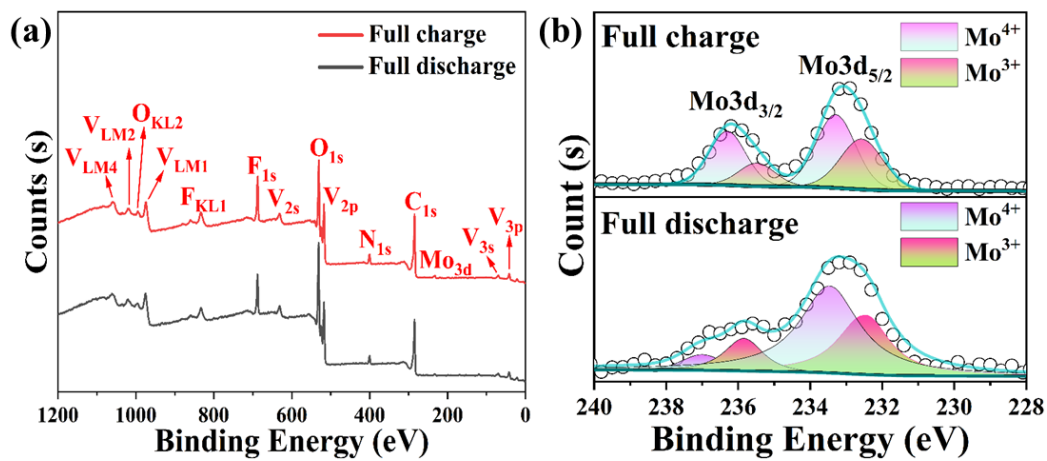

Figure S12. (a) Full XPS spectra during full charge and full discharge; (b) XPS spectra of Mo3d during full charge and full discharge.



Figure S13

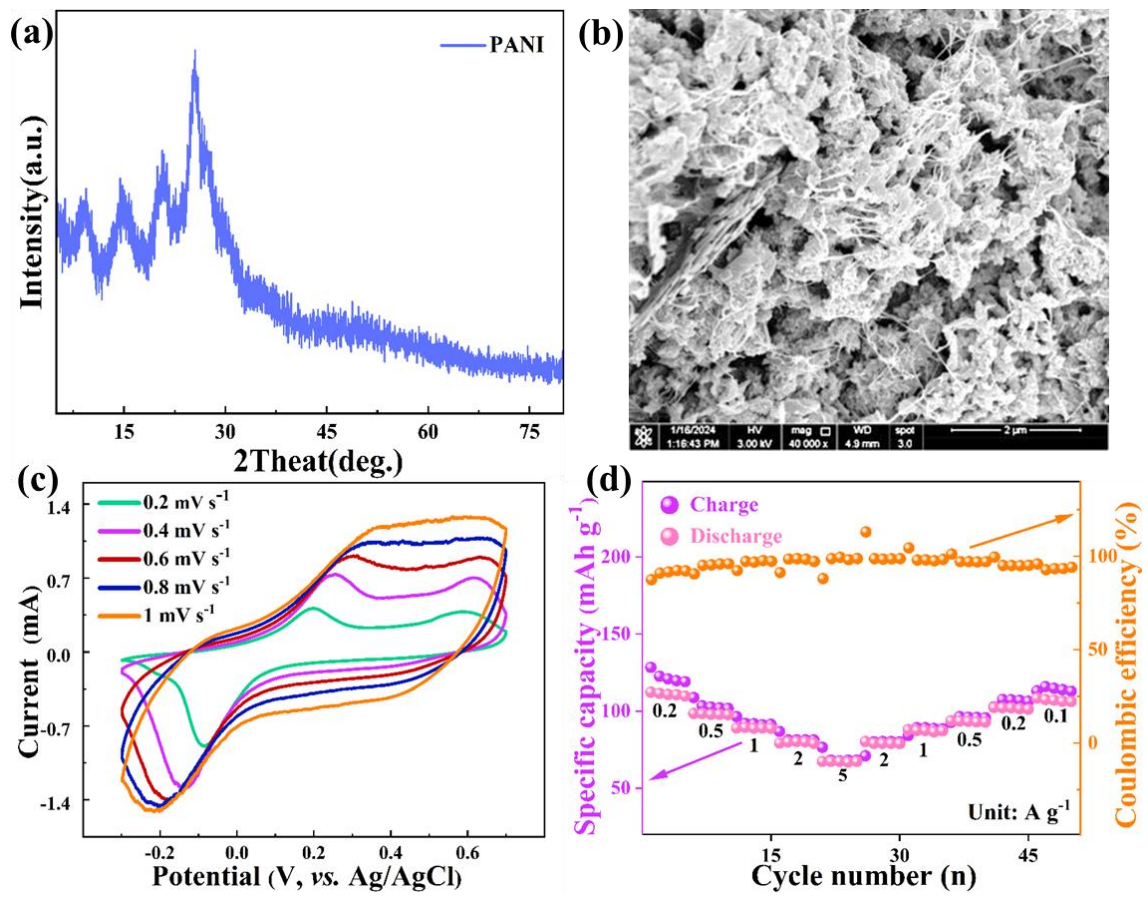

Figure S13. Characterization and electrochemical properties of PANI: (a) XRD pattern; (b) SEM image; (c) CV curves at different scan rates; (d) Rate performances at different current densities.

Figure S14

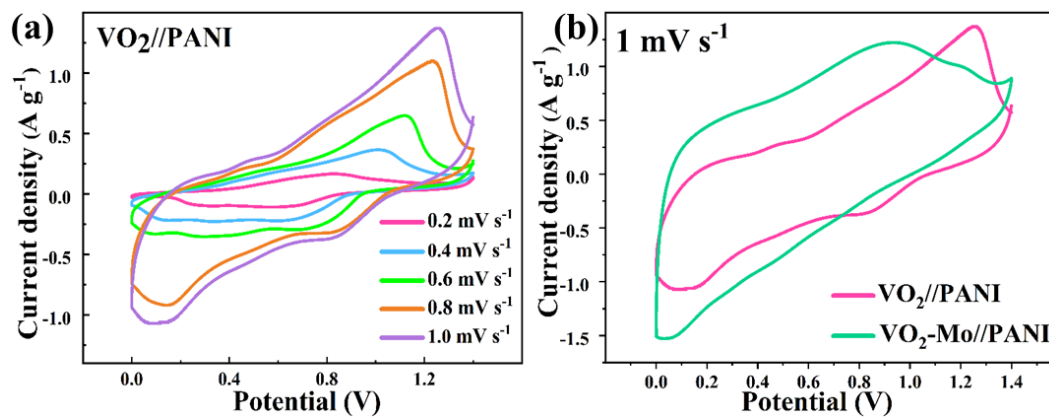

Figure S14. (a) CV curves of  $\text{VO}_2//\text{PANI}$  at different scan rates; (b) Comparison of CV curves of  $\text{VO}_2\text{-Mo//PANI}$  and  $\text{VO}_2//\text{PANI}$  batteries at  $1 \text{ mV s}^{-1}$ .

5Figure S15

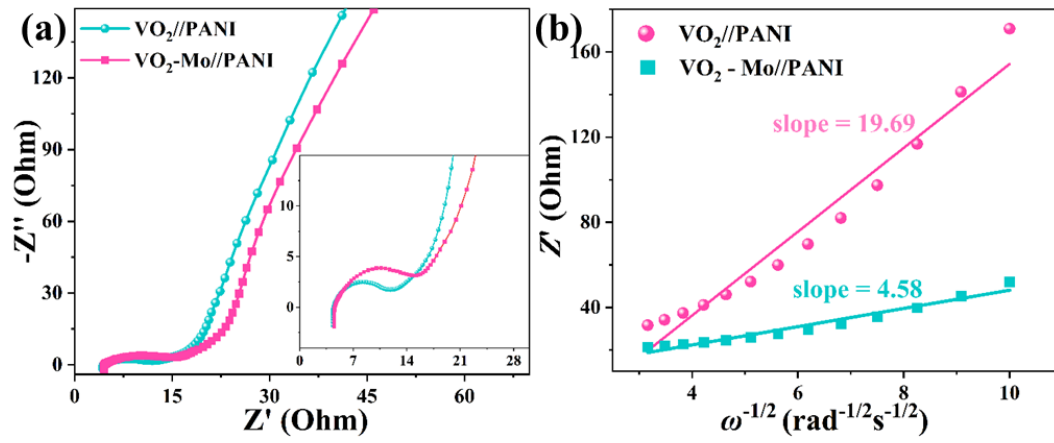

Figure S15. (a) Nyquist plots and (b) Fitting of  $Z'$ - $\omega^{-1/2}$  curves of  $\text{VO}_2//\text{PANI}$  and  $\text{VO}_2\text{-Mo//PANI}$ .

Figure S16

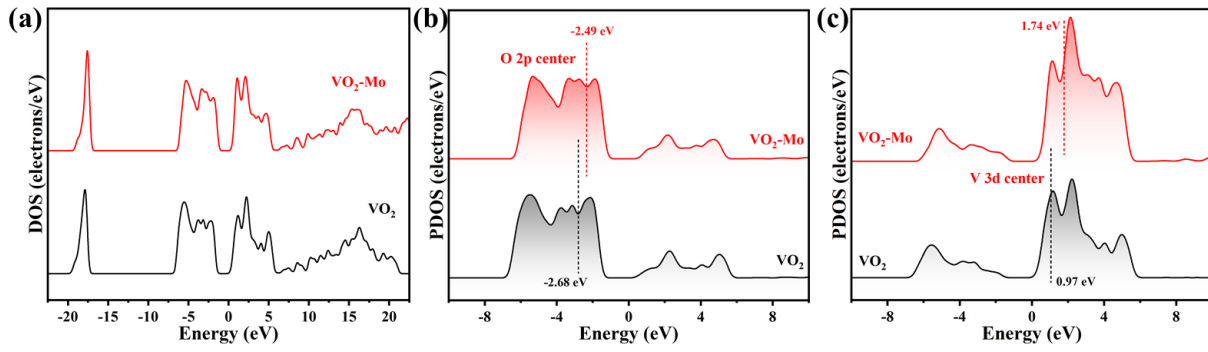

Figure S16. (a) DOS of  $\text{VO}_2$  and  $\text{VO}_2\text{-Mo}$ ; (b-c) PDOS of O2p and V3d of  $\text{VO}_2$  and  $\text{VO}_2\text{-Mo}$ .

Figure S17

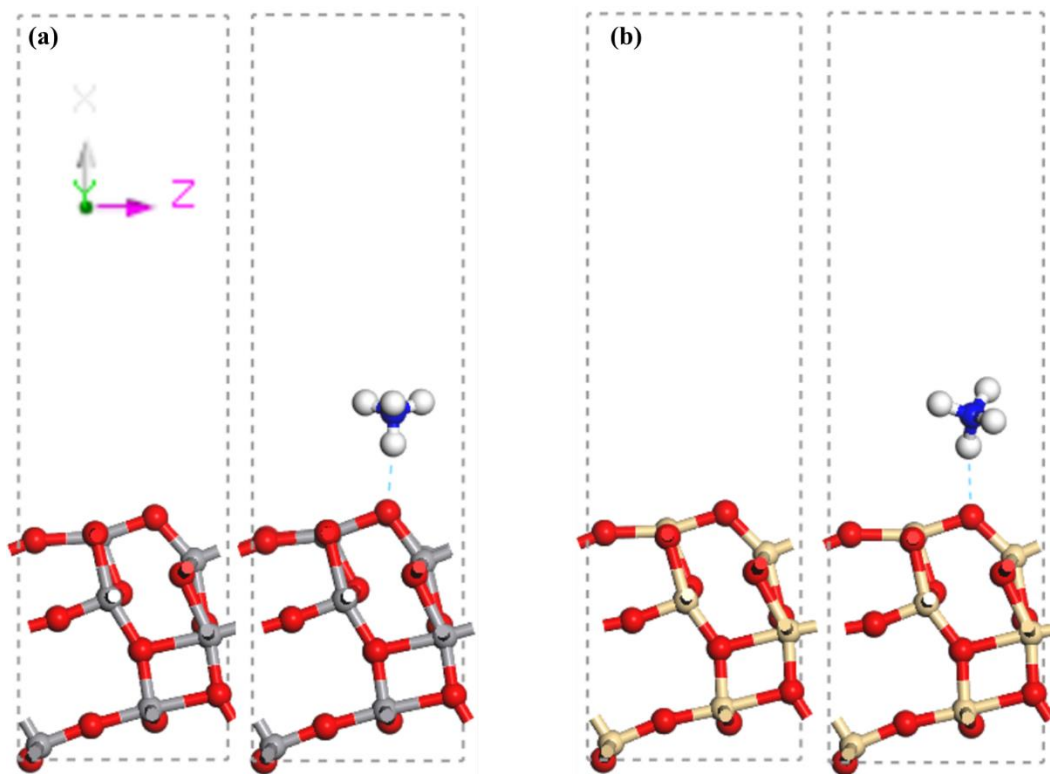

Figure S17. The structural models of (a)  $\text{VO}_2$  and (b)  $\text{VO}_2\text{-Mo}$  for calculating the adsorption energy with ammonium ion.

**Table S1**

**Table S1.** Comparison of electrochemical properties of VO<sub>2</sub> and VO<sub>2</sub>-Mo for NH<sub>4</sub><sup>+</sup> storage compared with other materials for NH<sub>4</sub><sup>+</sup> storage reported in previous researches.

| <b>Materials</b>                                       | <b>Electrolyte</b>                                    | <b>Specific capacity, current density</b>        | <b>Ref.</b> |
|--------------------------------------------------------|-------------------------------------------------------|--------------------------------------------------|-------------|
| VO <sub>2</sub> -Mo                                    | 1 M (NH <sub>4</sub> ) <sub>2</sub> SO <sub>4</sub>   | ~370 mAh·g <sup>-1</sup> @0.1 A·g <sup>-1</sup>  | This work   |
| VO <sub>2</sub>                                        | 1 M (NH <sub>4</sub> ) <sub>2</sub> SO <sub>4</sub>   | ~232 mAh·g <sup>-1</sup> @0.1 A·g <sup>-1</sup>  | This work   |
| d-VO nanoribbon                                        | 1 M (NH <sub>4</sub> ) <sub>2</sub> SO <sub>4</sub>   | ~200 mAh·g <sup>-1</sup> @0.1 A·g <sup>-1</sup>  | [2]         |
| d-HVO-2                                                | 1 M (NH <sub>4</sub> ) <sub>2</sub> SO <sub>4</sub>   | 220 mAh·g <sup>-1</sup> @0.1 A·g <sup>-1</sup>   | [3]         |
| VOPO <sub>4</sub> ·2H <sub>2</sub> O                   | 1 M NH <sub>4</sub> OTf                               | 154.6 mAh·g <sup>-1</sup> @0.1 A·g <sup>-1</sup> | [4]         |
| VS <sub>2</sub>                                        | 5 M (NH <sub>4</sub> ) <sub>2</sub> SO <sub>4</sub>   | 120 mAh·g <sup>-1</sup> @0.1 A·g <sup>-1</sup>   | [5]         |
| FVO                                                    | 1 M (NH <sub>4</sub> ) <sub>2</sub> SO <sub>4</sub>   | 88.6 mAh·g <sup>-1</sup> @0.1 A·g <sup>-1</sup>  | [6]         |
| NH <sub>4</sub> V <sub>4</sub> O <sub>10</sub>         | 1 M (NH <sub>4</sub> ) <sub>2</sub> SO <sub>4</sub>   | 167 mAh·g <sup>-1</sup> @0.1 A·g <sup>-1</sup>   | [7]         |
| Berlin Green                                           | 0.5 M (NH <sub>4</sub> ) <sub>2</sub> SO <sub>4</sub> | 90 mAh·g <sup>-1</sup> @0.1 A·g <sup>-1</sup>    | [8]         |
| MoO <sub>3</sub>                                       | 1 M NH <sub>4</sub> Cl                                | 115 mAh·g <sup>-1</sup> @0.1 A·g <sup>-1</sup>   | [9]         |
| MnOx                                                   | 0.5 M NH <sub>4</sub> Ac                              | 176 mAh·g <sup>-1</sup> @0.5 A·g <sup>-1</sup>   | [10]        |
| NaFe <sup>III</sup> Fe <sup>II</sup> (CN) <sub>6</sub> | 1 M (NH <sub>4</sub> ) <sub>2</sub> SO <sub>4</sub>   | 62 mAh·g <sup>-1</sup> @0.25 A·g <sup>-1</sup>   | [11]        |
| MnAl-LDH                                               | 0.5 M (NH <sub>4</sub> ) <sub>2</sub> SO <sub>4</sub> | 84 mAh·g <sup>-1</sup> @0.1 A·g <sup>-1</sup>    | [12]        |
| CuHCF                                                  | 0.5 M (NH <sub>4</sub> )SO <sub>4</sub>               | 60 mAh·g <sup>-1</sup> @0.1 A·g <sup>-1</sup>    | [13]        |
| Titanic acid                                           | 25 M AmAc                                             | 84 mAh·g <sup>-1</sup> @1 A·g <sup>-1</sup>      | [14]        |

**Table S2**

**Table S2.** Comparison of the electrochemical performances of the VO<sub>2</sub>@C||PANI full battery in this work with some reported batteries.

| <b>Batteries (devices)</b>               | <b>Electrolyte</b>                              | <b>Energy density</b>                              | <b>Power density</b>                                | <b>Ref.</b> |
|------------------------------------------|-------------------------------------------------|----------------------------------------------------|-----------------------------------------------------|-------------|
| VO <sub>2</sub> @C  PANI                 | (NH <sub>4</sub> ) <sub>2</sub> SO <sub>4</sub> | 160 Wh kg <sup>-1</sup>                            | 168 W kg <sup>-1</sup>                              | This work   |
| MnO <sub>2</sub> //d-VO                  | (NH <sub>4</sub> ) <sub>2</sub> SO <sub>4</sub> | 96.1 Wh kg <sup>-1</sup><br>26 Wh kg <sup>-1</sup> | 51.4 W kg <sup>-1</sup><br>3254 Wh kg <sup>-1</sup> | [2]         |
| MnAILDH//PTCDI                           | (NH <sub>4</sub> ) <sub>2</sub> SO <sub>4</sub> | 45.8 Wh kg <sup>-1</sup>                           | 163.5 Wh kg <sup>-1</sup>                           | [12]        |
| MoO <sub>3</sub> @C//MoO <sub>3</sub> @C | (NH <sub>4</sub> ) <sub>2</sub> SO <sub>4</sub> | 78.3 Wh kg <sup>-1</sup>                           | 929.1 Wh kg <sup>-1</sup>                           | [15]        |
| MoO <sub>3</sub> //CuFe PBA              | PAM hydrogel                                    | 21.3 Wh kg <sup>-1</sup>                           | 277 Wh kg <sup>-1</sup>                             | [9]         |
| NVO//AC                                  | NH <sub>4</sub> Cl/PVA                          | 15.9 Wh kg <sup>-1</sup>                           | 9.16 W kg <sup>-1</sup>                             | [16]        |
| PVO//AC                                  | NH <sub>4</sub> Cl/PVA                          | 17.5 Wh kg <sup>-1</sup>                           | 25.4 W kg <sup>-1</sup>                             | [17]        |
| ACC@VPP//PTCDI                           | NH <sub>4</sub> Cl/PVA                          | 10.6 Wh kg <sup>-1</sup>                           | 28.9 Wkg <sup>-1</sup>                              | [18]        |
| VOH/PEDOT//AC                            | NH <sub>4</sub> Cl/PVA                          | 10.4 Wh kg <sup>-1</sup>                           | 35.7 W kg <sup>-1</sup>                             | [19]        |
| KVO/PANI//AC                             | NH <sub>4</sub> Cl/PVA                          | 31.8 Wh kg <sup>-1</sup>                           | 47.6 W kg <sup>-1</sup>                             | [20]        |

PVA = Polyvinyl Alcohol.

## References

- [1] S.F. Kuchena, Y. Wang, Superior Polyaniline Cathode Material with Enhanced Capacity for Ammonium Ion Storage, *ACS Appl. Energy Mater.* 3 (2020) 11690-11698.
- [2] Y. Wu, S. Dong, N. Lv, Z. Xu, R. Ren, G. Zhu, B. Huang, Y. Zhang, X. Dong, Unlocking the High Capacity Ammonium-Ion Storage in Defective Vanadium Dioxide, *Small* 18 (2022) 2204888.
- [3] J.n. Gong, P. Bai, J. Sun, Y. Liu, X. Dong, T. Hu, C. Meng, Y. Zhang, Adjusting oxygen vacancy of  $\text{VO}_2 \cdot x\text{H}_2\text{O}$  nanoarray architectures for efficient  $\text{NH}_4^+$  storage, *Nano Res.* 17 (2024) 2646-2654.
- [4] F. Ye, R. Pang, C. Lu, Q. Liu, Y. Wu, R. Ma, L. Hu, Reversible Ammonium Ion Intercalation/de-intercalation with Crystal Water Promotion Effect in Layered  $\text{VOPO}_4 \cdot 2\text{H}_2\text{O}$ , *Angew. Chem. Int. Ed.* 62 (2023) e202303480.
- [5] D. Yu, Z. Wei, X. Zhang, Y. Zeng, C. Wang, G. Chen, Z.X. Shen, F. Du, Boosting  $\text{Zn}^{2+}$  and  $\text{NH}_4^+$  Storage in Aqueous Media via In-Situ Electrochemical Induced  $\text{VS}_2/\text{VO}_x$  Heterostructures, *Adv. Funct. Mater.* 31 (2021) 2008743.
- [6] W. Xu, L. Zhang, K. Zhao, X. Sun, Q. Wu, Layered ferric vanadate nanosheets as a high-rate  $\text{NH}_4^+$  storage electrode, *Electrochim. Acta* 360 (2020) 137008.
- [7] H. Li, J. Yang, J. Cheng, T. He, B. Wang, Flexible aqueous ammonium-ion full cell with high rate capability and long cycle life, *Nano Energy* 68 (2020) 104369.
- [8] X. Wu, Y. Xu, H. Jiang, Z. Wei, J.J. Hong, A.S. Hernandez, F. Du, X. Ji,  $\text{NH}_4^+$  Topotactic Insertion in Berlin Green: An Exceptionally Long-Cycling Cathode in Aqueous Ammonium-Ion Batteries, *ACS Appl. Energy Mater.* 1 (2018) 3077-3083.
- [9] G. Liang, Y. Wang, Z. Huang, F. Mo, X. Li, Q. Yang, D. Wang, H. Li, S. Chen, C. Zhi, Initiating Hexagonal  $\text{MoO}_3$  for Superb-Stable and Fast  $\text{NH}_4^+$  Storage Based on Hydrogen Bond Chemistry, *Adv. Mater.* 32 (2020) e1907802.
- [10] Y. Song, Q. Pan, H. Lv, D. Yang, Z. Qin, M.Y. Zhang, X. Sun, X.X. Liu, Ammonium-Ion Storage Using Electrodeposited Manganese Oxides, *Angew. Chem. Int. Ed.* 60 (2021) 5718-5722.
- [11] C. Li, W. Yan, S. Liang, P. Wang, J. Wang, L. Fu, Y. Zhu, Y. Chen, Y. Wu, W. Huang, Achieving a high-performance Prussian blue analogue cathode with an ultra-stable redox reaction for ammonium ion storage, *Nanoscale Horiz.* 4 (2019) 991-998.



- [12] Q. Liu, F. Ye, K. Guan, Y. Yang, H. Dong, Y. Wu, Z. Tang, L. Hu, MnAl Layered Double Hydroxides: A Robust Host for Aqueous Ammonium-Ion Storage with Stable Plateau and High Capacity, *Adv. Energy Mater.* 13 (2023) 2202908.
- [13] C.D. Wessells, S.V. Peddada, M.T. McDowell, R.A. Huggins, Y. Cui, The Effect of Insertion Species on Nanostructured Open Framework Hexacyanoferrate Battery Electrodes, *J. Electrochem. Soc.* 159 (2011) A98-A103.
- [14] J.J. Holoubek, H. Jiang, D. Leonard, Y. Qi, G.C. Bustamante, X. Ji, Amorphous titanate electrode: its electrochemical storage of ammonium in a new water-in-salt electrolyte, *Chem. Commun.* 54 (2018) 9805-9808.
- [15] J. Dai, X. Qi, L. Xia, Q. Xue, L. Luo, X. Wang, C. Yang, D. Li, H. Xie, A. Cabot, L. Dai, Y. Xu, Aqueous Ammonium-Ion Supercapacitors with Unprecedented Energy Density and Stability Enabled by Oxygen Vacancy-Enriched MoO<sub>3</sub>@C, *Adv. Funct. Mater.* 33 (2023) 2212440.
- [16] P. Wang, Y. Zhang, H. Jiang, X. Dong, C. Meng, Ammonium vanadium oxide framework with stable NH<sub>4</sub><sup>+</sup> aqueous storage for flexible quasi-solid-state supercapacitor, *Chem. Eng. J.* 427 (2022) 131548.
- [17] P. Wang, Y. Zhang, Z. Feng, Y. Liu, C. Meng, A dual-polymer strategy boosts hydrated vanadium oxide for ammonium-ion storage, *J. Colloid Interface Sci.* 606 (2022) 1322-1332.
- [18] X. Chen, P. Wang, Z. Feng, C. Meng, Y. Zhang, Conductive polymer intercalated vanadium oxide on carbon cloth for fast ammonium-ion storage in supercapacitor applications, *Chem. Eng. J.* 445 (2022) 136747.
- [19] X. Chen, P. Wang, Z. Feng, Y. Liu, M. Cui, C. Meng, Y. Zhang, Structural regulation of vanadium oxide by poly(3,4-ethylenedioxythiophene) intercalation for ammonium-ion supercapacitors, *Adv. Sensor Energy Mater.* 1 (2022) 100013.
- [20] X. Chen, Z. Feng, X. Dong, H. Jiang, C. Meng, Y. Zhang, Synergistic effect of K<sup>+</sup> and PANI in vanadium oxide hydration by interlayer engineering boosts the ammonium ion storage, *SusMat* 3 (2023) 263-275.
